# Supplementary material for: Species extinction thresholds in the face of spatially correlated periodic disturbance
Source: PubMed Central journal article supplement (PMC4612536; doi:10.1038/srep15455), 2015-10-20
Supplement: srep15455-s1.pdf [file srep15455-s1.pdf]

## Species extinction thresholds in the face of spatially correlated periodic disturbance

Jinbao Liao<sup>a,\*</sup>, Zhixia Ying<sup>b</sup>, David E. Hiebeler<sup>c</sup>, Yeqiao Wang<sup>a</sup>, Takenori Takada<sup>d</sup>, Ivan Nijs<sup>e</sup>

<sup>a</sup> Ministry of Education's Key Laboratory of Poyang Lake Wetland and Watershed Research, Jiangxi Normal University, Ziyang Road 99, 330022 Nanchang, China.

<sup>b</sup> State Key Laboratory of Vegetation and Environmental Change, Institute of Botany, Chinese Academy of Sciences, Beijing 100093, China.

<sup>c</sup> Department of Mathematics and Statistics, University of Maine, 333 Neville Hall, Orono, ME 04469, USA.

<sup>d</sup> Laboratory of Mathematical Ecology, Graduate School of Earth Environmental Science, Hokkaido University, 060-0810 Sapporo, Japan.

<sup>e</sup> Research Group Plant and Vegetation Ecology, Department of Biology, University of Antwerp (Campus Drie Eiken), Universiteitsplein 1, B-2610 Wilrijk, Belgium.

\* Corresponding author: Dr. Jinbao Liao ([jinbaoliao@163.com](mailto:jinbaoliao@163.com))

Tel.: +86-(0)791-88120537; Fax: +86-(0)791-88120538

## Supplementary Information

### Supplementary A – Derivation of local population dynamics

As  $q_{I/I} = \rho_{II}/\rho_I$  (see Methods), we have the dynamics of local population density

$$\frac{dq_{I/I}}{dt} = -\frac{q_{I/I}}{\rho_I} \cdot \frac{d\rho_I}{dt} + \frac{1}{\rho_I} \cdot \frac{d\rho_{II}}{dt}, \quad (\text{A.1})$$

in which the transition rate of doublet density  $\rho_{II}$  is

$$\frac{d\rho_{II}}{dt} = -2 \cdot \left( m + \frac{1}{z} \gamma + \frac{z-1}{z} \gamma \cdot q_{I/II} \right) \cdot \rho_{II} + 2 \cdot \rho_{IE} \cdot \left\{ \alpha \cdot \left[ z^{-1} + (1 - z^{-1}) \cdot q_{I/EI} \right] + \beta \cdot \rho_I \right\}. \quad (\text{A.2})$$

In equation (A.2), the first term denotes the transition of the pair  $I-I \rightarrow I-E$  or  $E-I$  because of species mortality, including intrinsic mortality ( $m$ ) and increased mortality by intraspecific competition. As a target individual  $I$  has four nearest neighbours ( $z=4$ ) following Von Neumann neighbourhood, species mortality caused by conspecific competition can be affected by the already presence of a neighbouring individual  $I$  in the pair of  $I-I$  sites ( $1/z$ ), as well as the potential presence of conspecific individuals  $I$  from the remaining neighbours  $(z-1)/z$ . The second term describes the transition rate of the pair  $I-E$  (or  $E-I$ ) becoming  $I-I$ , which can be achieved by both local and global dispersal. With local dispersal, species establishing the  $E$ -site in a pair of  $I-E$  can be realized by two possible ways: the local colonization from the individual  $I$  in the pair of  $I-E$ , and the potential presence of individuals from other  $z-1$  neighbours of the target  $E$ . The parameter  $q_{i/jk}$  (e.g.,  $q_{I/II}$  and  $q_{I/EI}$ ;  $i, j, k \in \{E, I\}$ ) represents the conditional probability for an  $i$ -site which is another neighbour of a  $j$ -site in the pair of  $j-k$ . According to the pair approximation<sup>20</sup> with  $q_{i/jk} \approx q_{i/j}$ , we can rewrite equation (A.2) as

$$\frac{d\rho_{II}}{dt} = -2 \cdot \left( m + \frac{1}{z} \gamma + \frac{z-1}{z} \gamma \cdot q_{III} \right) \cdot \rho_{II} + 2 \cdot \rho_{IE} \cdot \left\{ \alpha \cdot \left[ z^{-1} + (1 - z^{-1}) \cdot q_{III} \right] + \beta \cdot \rho_I \right\}, \quad (\text{A.3})$$

where

$$q_{III} = \frac{\rho_{IE}}{\rho_E} = \frac{\rho_{IE}}{1 - \rho_I} \cdot \frac{\rho_I}{\rho_I} = \rho_I \cdot \frac{q_{E/I}}{1 - \rho_I} = \rho_I \cdot \frac{1 - q_{III}}{1 - \rho_I}, \quad (\text{A.4})$$

with  $q_{E/I} = \rho_{IE} / \rho_I$  and  $q_{E/I} + q_{III} = 1$ .

Combining equations (1), (A.1), (A.3) and (A.4), we can derive the dynamics of local population density  $q_{III}$  as

$$\begin{aligned} \frac{dq_{III}}{dt} = & 2 \cdot (1 - q_{III}) \cdot \left\{ \alpha \cdot \left[ \frac{1}{z} + \frac{(z-1) \cdot (1 - q_{III}) \cdot \rho_I}{z \cdot (1 - \rho_I)} \right] + \beta \cdot \rho_I \right\} \\ & - q_{III} \cdot \left[ \alpha \cdot (1 - q_{III}) + \beta \cdot (1 - \rho_I) + \left( m + \frac{2}{z} \gamma + \frac{z-2}{z} \gamma \cdot q_{III} \right) \right] \end{aligned} \quad (\text{A.5})$$
